# Supplementary material for: CD47 expression is critical for CAR T-cell survival in vivo
Source: PubMed Central journal article supplement — J Immunother Cancer. 2023 Mar 14;11(3):e005857. doi: 10.1136/jitc-2022-005857 (PMC10016274; doi:10.1136/jitc-2022-005857), 2023-03-14
Supplement: jitc-2022-005857supp001.pdf [file jitc-2022-005857supp001.pdf]

|                          |                                                                                                                                                                                                                                                       |
|--------------------------|-------------------------------------------------------------------------------------------------------------------------------------------------------------------------------------------------------------------------------------------------------|
| CV1                      | EEELQIIQPDKSVLVAAGETATLRCTITSLFPVGPIQWFRGAGPGRVLIY<br>NQRQGPFPRTTSDTTKRNNMDFSI RIGNITPADAGTYCYIKFRKGS<br>PDDVEFKSGAGTELSVRAKPS                                                                                                                        |
| CD8 $\alpha$<br>Hinge/TM | TTTPAPRPPTPAPTIASQPLSLRPEACRPAAGGAVHTRGLDFACDIYW<br>APLAGTCGVLLLSLVITLYC                                                                                                                                                                              |
| CD28<br>Costim           | RSKRSRLLHSDYMNMTPRRPGPTRKHYQPYAPPRDFAAYRS                                                                                                                                                                                                             |
| CD3 $\zeta$              | RVKFSRSADAPAYQQGQNQLYNELNLGRREEYDVLDKRRGRDPEMG<br>GKPRRKNPQEGLYNELQKDKMAEAYSEIGMKGERRRGKGDGLYQG<br>LSTATKDTYDALHMQALPPR                                                                                                                               |
| P2A                      | GSGATNFSLLKQAGDVEENPGP                                                                                                                                                                                                                                |
| ZsG                      | MAQSKHGLTKEMTMKYRMEGCVDGHKFVITGEGIGYPFKGKQAINLC<br>VVEGGPLPFAEDILSAAFNYGNRVFTEYPQDIVDYFKNSCPAGYTWDR<br>SFLFEDGAVCICNADITVSVEENCMYHESKFYGVNFPADGPVMMKMT<br>DNWEPSCEKIIPVKQGILKGDVSMYLLLDGGRLRCQFDTVYKAKSV<br>PRKMPDWHFIQHKLTREDRSDAKNQKWHLTEHAIASGSALP |

**Supplemental figure 1. Amino acid sequences of CV1-CAR components.** TM = transmembrane domain

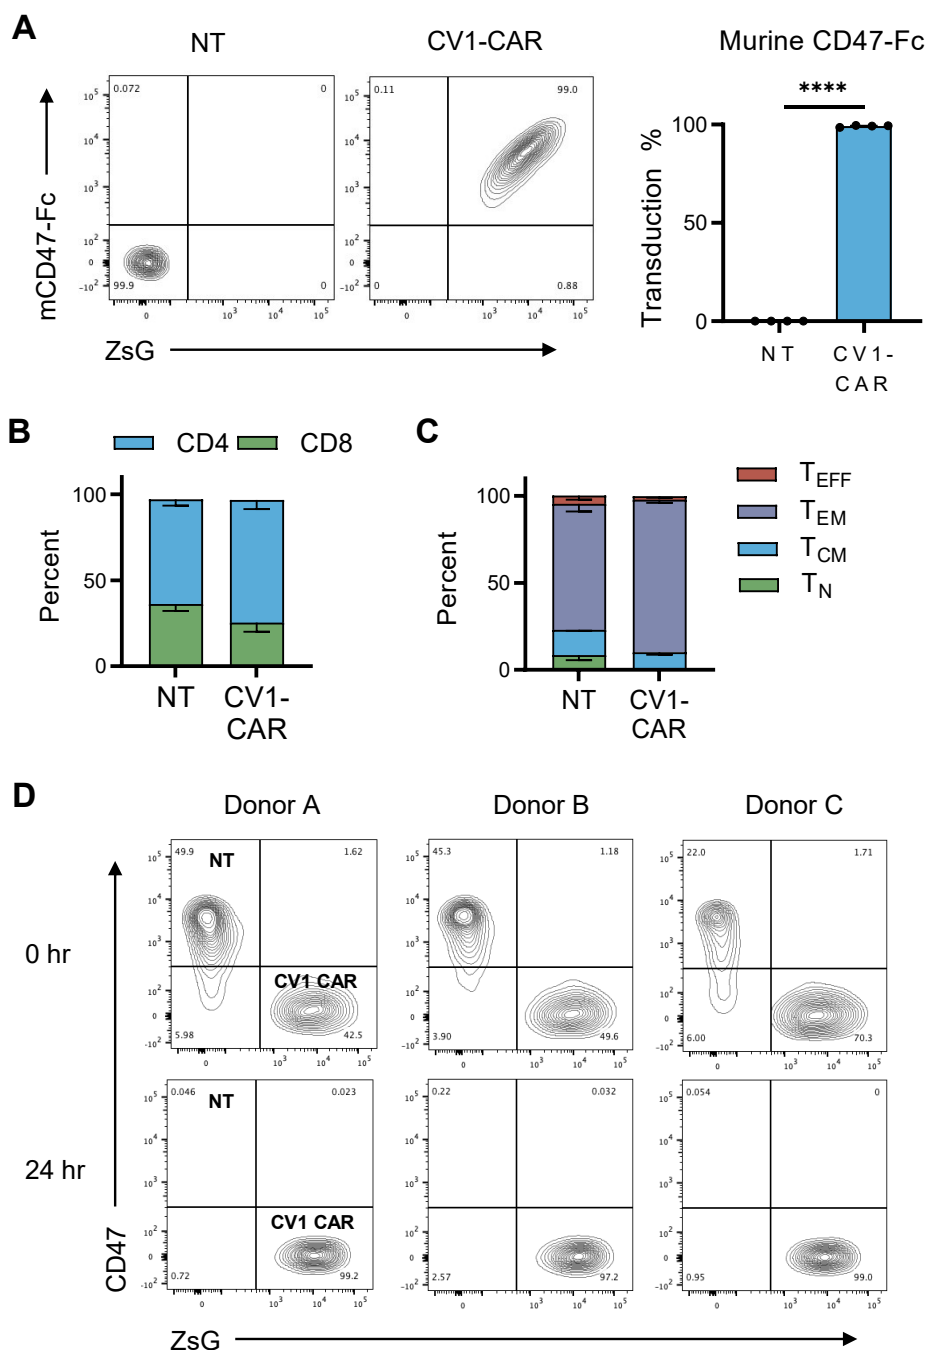

**Supplemental figure 2. CV1-CAR T cells bind murine CD47, have phenotypic markers similar to NT T cells, and kill CD47-positive NT T cells.** (A) Representative flow plots of NT or CV1-CAR T cells binding recombinant murine CD47-Fc protein (left panel), and summary data (right panel;  $n = 4$ ). (B) CD4/CD8 ratios ( $n = 5$ ) and (C) memory T cell phenotypes ( $n = 5$ ) of NT and CV1-CAR T cells.  $T_{EFF}$  = terminal effector (CCR7-/CD45RO-),  $T_{EM}$  = effector memory (CCR7-/CD45RO+),  $T_{CM}$  = central memory (CCR7+/CD45RO+),  $T_N$  = naïve-like (CCR7+/CD45RO-). (D) CV1-CAR T cell killing of CD47-positive/ZsG-negative NT T cells was confirmed in 3 additional donors by flow cytometry immediately post coculture (0 hr) and 24 hr post coculture. Data represents mean  $\pm$  SEM (A,B, and C). \*\*\*\* $P < 0.0001$  by paired t test (A).

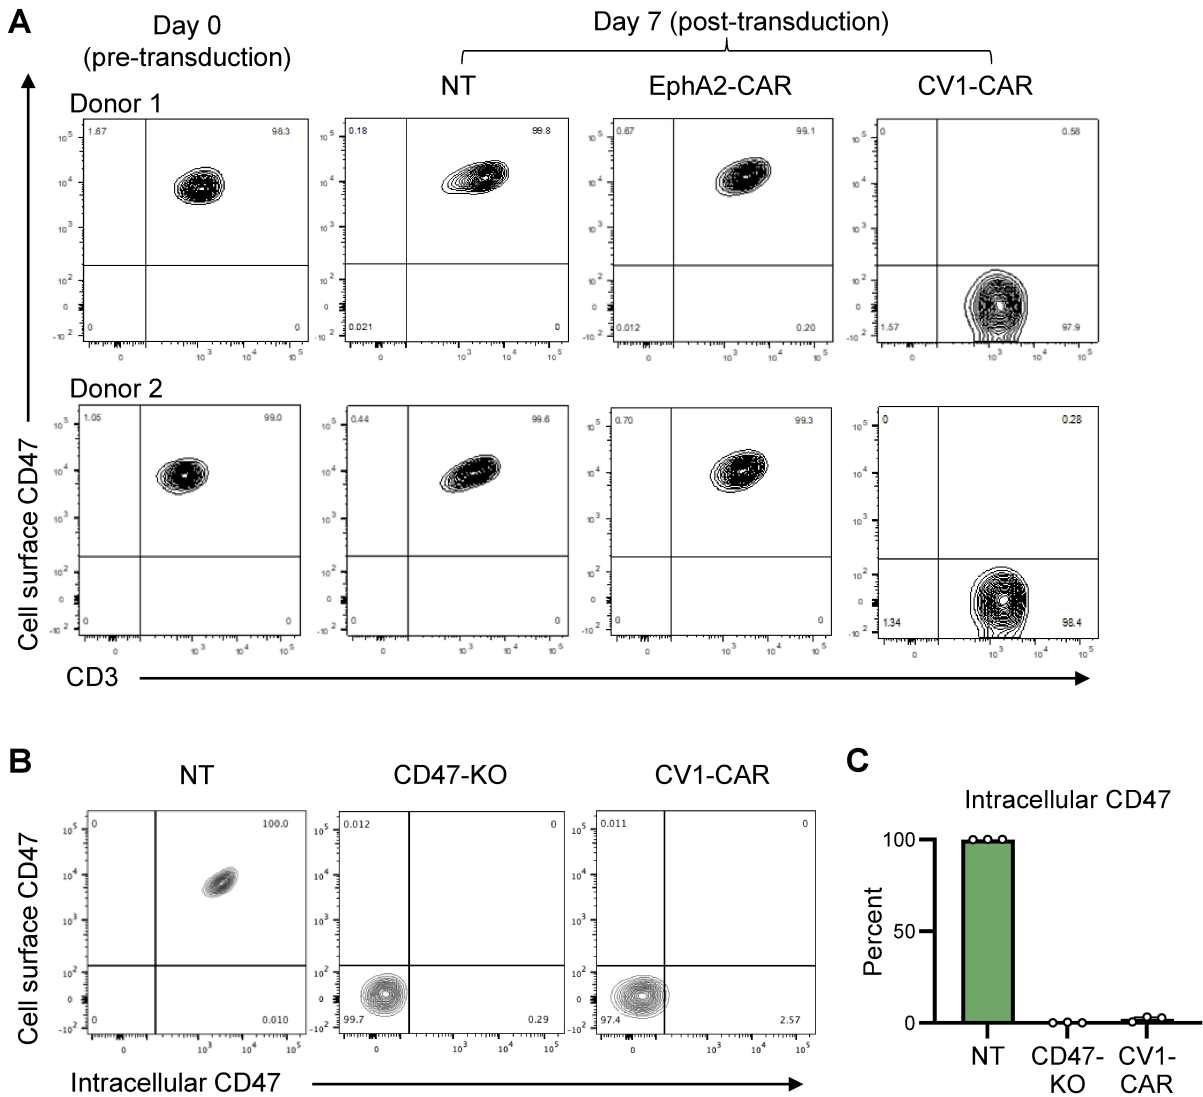

**Supplemental figure 3. CV1-CAR T cells downregulate CD47 expression post-transduction. (A)** Cell surface CD47 expression in CD3<sup>+</sup> T cells pre-transduction (day 0), and 7 days post-transduction for NT, EphA2-CAR and CV1-CAR T cells. **(B)** Representative flow plots of intracellular and cell surface CD47 expression in NT, negative control CD47-knockout and CV1-CAR T cells. **(C)** Summary intracellular CD47 expression in NT, CD47-knockout and CV1-CAR T cells (n = 3). Data represents mean  $\pm$  SEM (C).

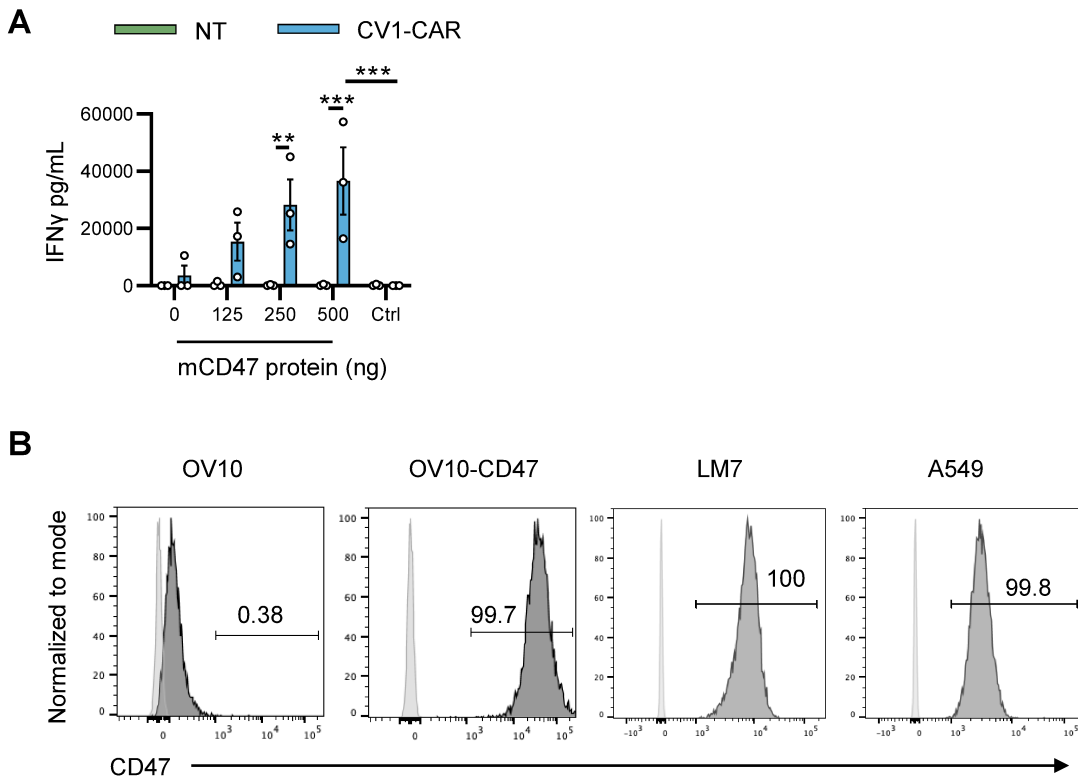

**Supplemental figure 4. CV1-CAR T cells recognize murine CD47, and human cell lines express CD47.** (A) CV1-CAR T cell IFN $\gamma$  production was measured 24 hours post coculture with recombinant murine CD47 (mCD47) protein (n = 3). CV1-CAR T cells vs 0 ng protein and Ctrl protein (500 ng B7-H3 protein) represent the same data points as Fig. 2A because experiments were run concurrently with the same T cell donors. (B) CD47 expression on OV10 (CD47-negative) compared to OV10-CD47 (CD47-positive), LM7 (osteosarcoma) and A549 (lung adenocarcinoma). Data represents mean  $\pm$  SEM (A). \*\* $P$  < 0.01, \*\*\* $P$  < 0.001, ns = non-significant by two-way ANOVA with Sidak's multiple comparisons test (A).

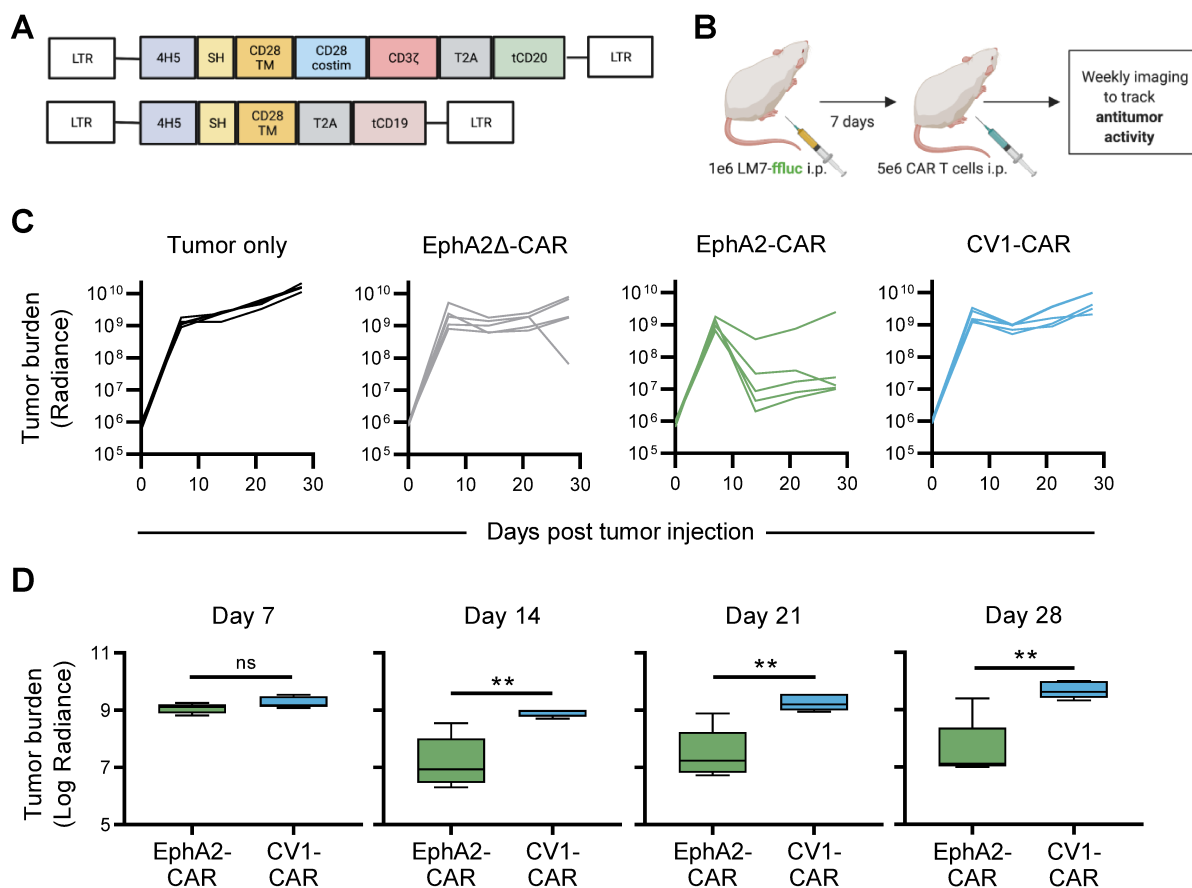

**Supplemental figure 5. CV1-CAR T cells lack antitumor activity against LM7 at a high T cell dose.** (A) Schematic representation of the EphA2-CAR with a truncated CD20 detection marker (top) and EphA2 $\Delta$ -CAR (no costimulatory domain and no CD3 $\zeta$  domain) with a truncated CD19 detection marker (bottom). SH = short hinge. (B) Schematic of the in vivo study. Mice were injected with  $1 \times 10^6$  LM7.GFP.ffauc cells i.p. on day 0, followed by no treatment (tumor only) or  $5 \times 10^6$  EphA2 $\Delta$ -CAR, EphA2-CAR, or CV1-CAR T cells i.p. on day 7 ( $n = 5$  per group). (C) Individual tumor bioluminescence measurements over time. (D) Summary tumor bioluminescence measurements over time. Radiance = photons/sec/cm<sup>2</sup>/sr. Data represents min to max (D). \*\* $P < 0.01$ , ns = non-significant by unpaired t test (D).

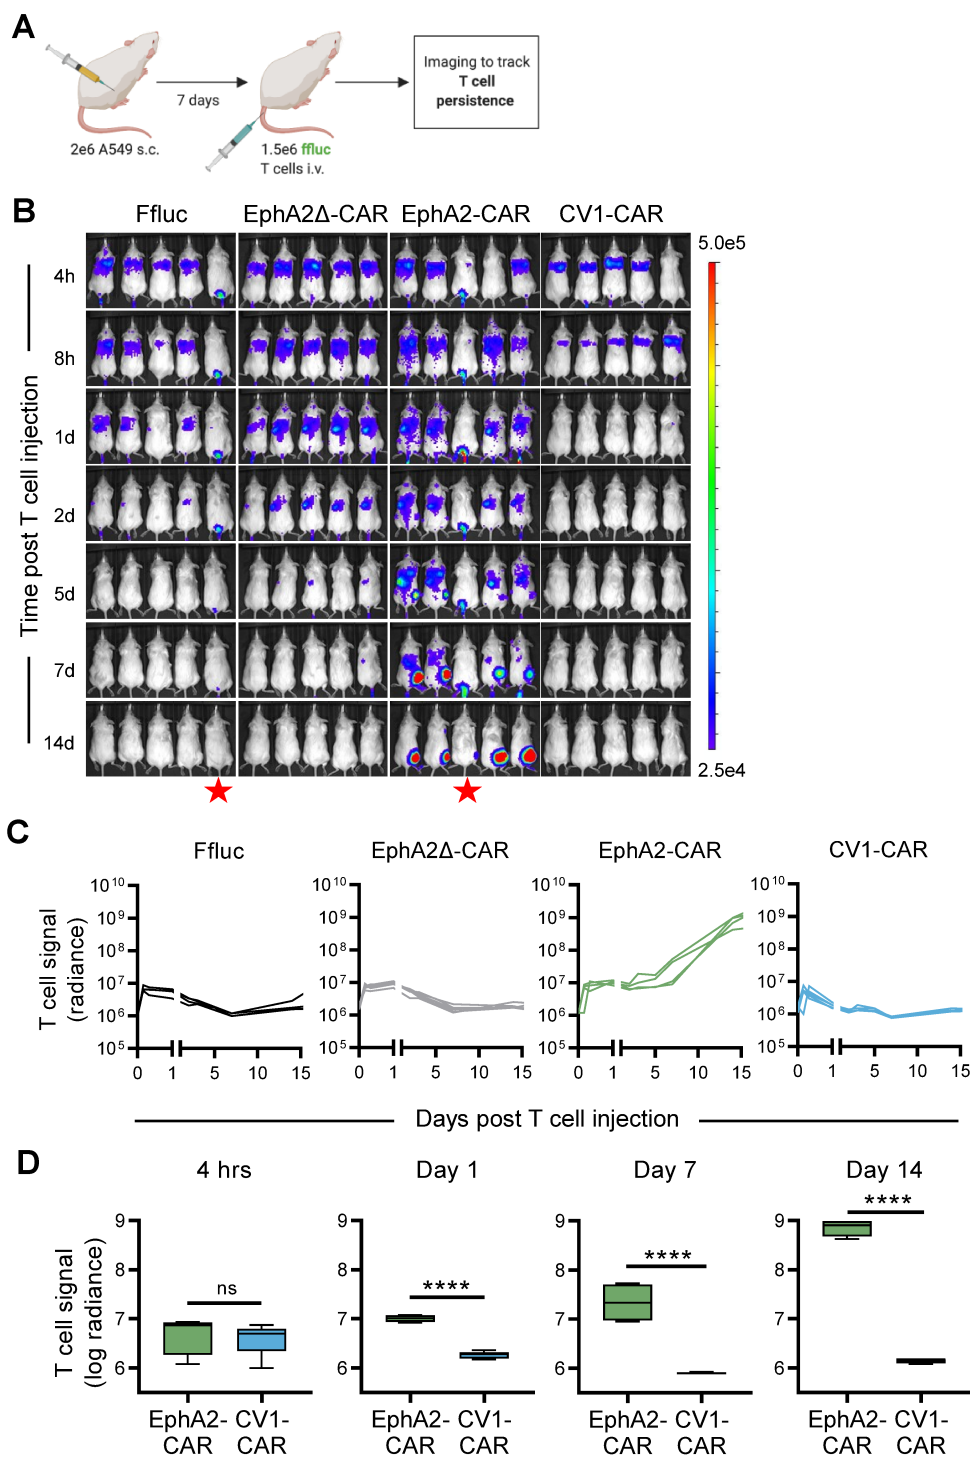

**Supplemental figure 6. CV1-CAR T cells are detectable 4 to 8 hours post infusion and fail to persist *in vivo*.** (A) Schematic of *in vivo* study. Mice were injected with  $2 \times 10^6$  A549 cells s.c. on day 0, followed by  $1.5 \times 10^6$  GFP. ffluc expressing EphA2Δ-CAR (n = 5), EphA2-CAR (n = 4), CV1-CAR (n = 5) or otherwise unmodified (Ffluc; n = 4) T cells i.v. on day 7. (B) Bioluminescence images at indicated time points post T cell injection (h = hour, d = day). (C) Individual bioluminescence measurements and (D) summary bioluminescence measurements over time. Red star indicates insufficient T cell injection and mouse not included in analysis. Radiance = photons/sec/cm<sup>2</sup>/sr. Data represents min to max (D). \*\*\*\**P* < 0.0001, ns = non-significant by unpaired t test (D).

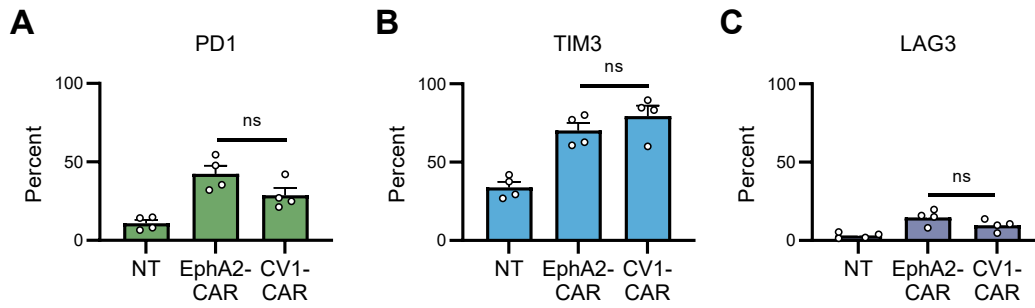

**Supplemental figure 7. EphA2-CAR and CV1-CAR T cells have similar cell surface exhaustion markers post-transduction.** Flow cytometry was performed to evaluate (A) PD1, (B) TIM3, and (C) LAG3 expression on non-transduced (NT; n = 4), EphA2-CAR (n = 4) and CV1-CAR (n = 4) T cells. Data represents mean  $\pm$  SEM (A,B,C). ns = non-significant by one-way ANOVA with Dunnett's multiple comparisons test (A,B,C).

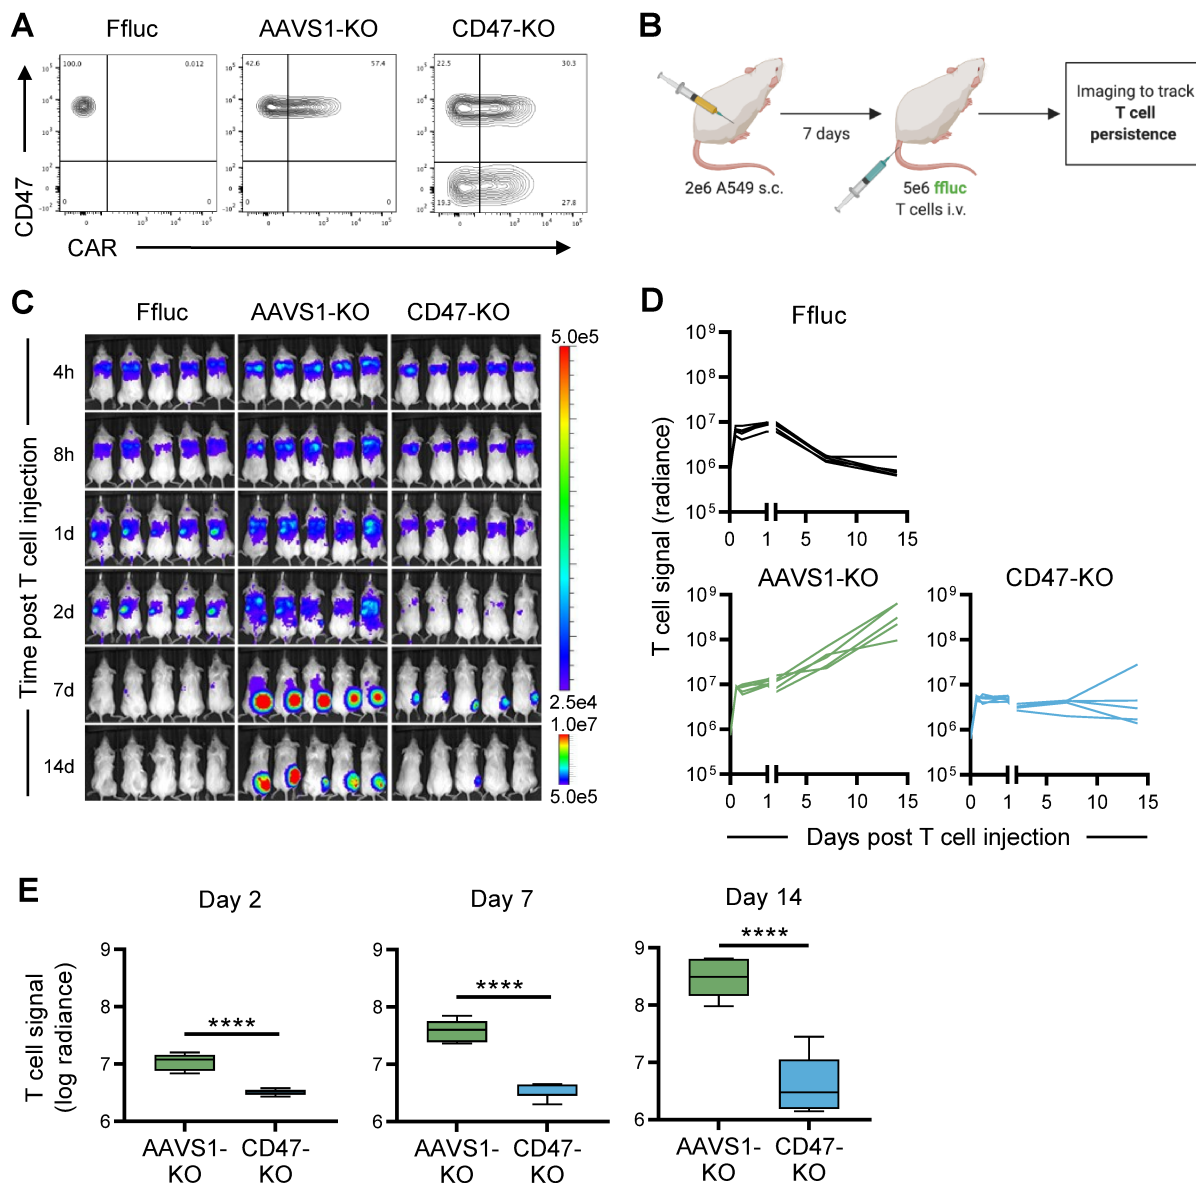

**Supplemental figure 8. CD47-negative CAR T cell failure to persist in vivo is not due to the knockout procedure.** CD47-negative CAR T cell persistence was evaluated in vivo using the A549 subcutaneous (s.c.) model and GFP.flluc expressing CD47-KO EphA2-CAR (CD47-KO), control AAVS1-KO EphA2-CAR (AAVS1-KO), or otherwise unmodified (Ffluc) T cells. **(A)** CD47 and CAR surface expression post-transduction and knockout for indicated T cell products. **(B)** Schematic of the in vivo study. Mice were injected with  $2 \times 10^6$  A549 cells s.c. on day 0, followed by  $5 \times 10^6$  AAVS1-KO ( $n = 5$ ), CD47-KO ( $n = 5$ ), or Ffluc ( $n = 5$ ) T cells i.v. on day 7. **(C)** Bioluminescence images for indicated time points post T cell injection (h = hour, d = day). **(D)** Individual and **(E)** summary bioluminescence measurements over time. Radiance = photons/sec/cm<sup>2</sup>/sr. Data represents min to max (E). \*\*\*\* $P < 0.0001$  by unpaired t test (E).



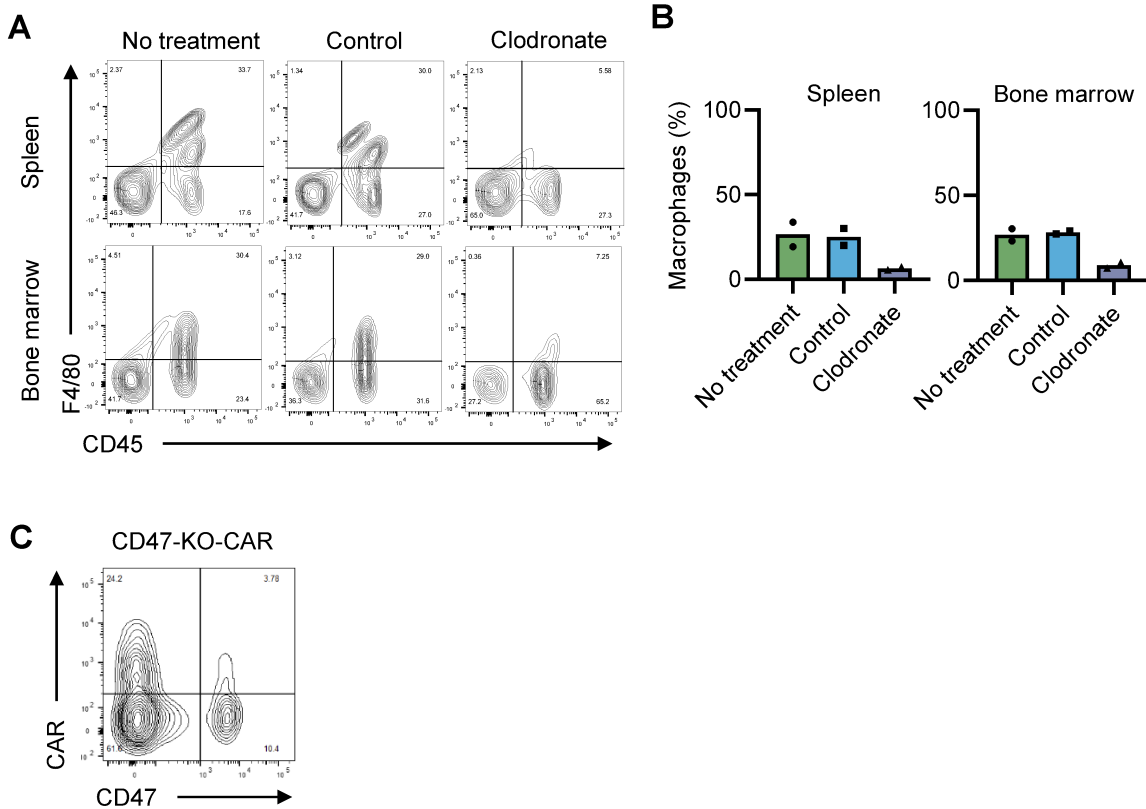

**Supplemental figure 9. Clodronate depletes macrophages in the bone marrow and spleen of NSG mice.** Flow cytometry was performed to detect macrophages in the spleen and bone marrow of NSG mice 48 hours after no treatment ( $n = 2$ ) or treatment with control ( $n = 2$ ) or clodronate ( $n = 2$ ) liposomes. **(A)** Representative flow plots and **(B)** summary data for macrophage detection in the spleen and bone marrow. **(C)** EphA2-CAR and CD47 expression in CD47-KO-CAR T cells used in main **figure 6**.
